# Supplementary material for: Phosphorylation-dependent 14-3-3 protein interactions regulate CFTR biogenesis
Source: PubMed Central journal article supplement — Mol Biol Cell. 2012 Mar 15;23(6):996–1009. doi: 10.1091/mbc.E11-08-0662 (PMC3302758; doi:10.1091/mbc.e11-08-0662), 2012-03-15
Supplement: supp_E11-08-0662v1_CombinedSupMats.pdf [file supp_E11-08-0662v1_CombinedSupMats.pdf]

**Supplemental Figure Legends:**

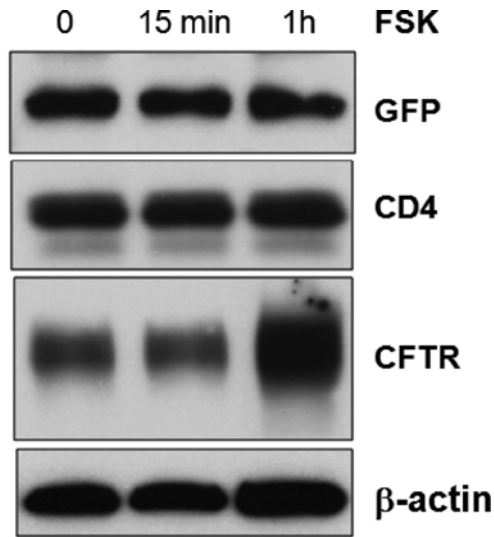

**Suppl Fig. 1**

**Supplemental Figure 1. Expression of other proteins is not increased by cAMP/PKA stimulation.** HEK293 cells were transiently transfected with plasmid DNAs encoding GFP and a truncated version of CD4. The expression vector (pcDNA3.1) and other conditions replicated those used in the CFTR expression studies shown in Figure 1. Time of forskolin treatment is indicated. Unlike CFTR, the expression levels of GFP and CD4 were not affected by cAMP/PKA stimulation.

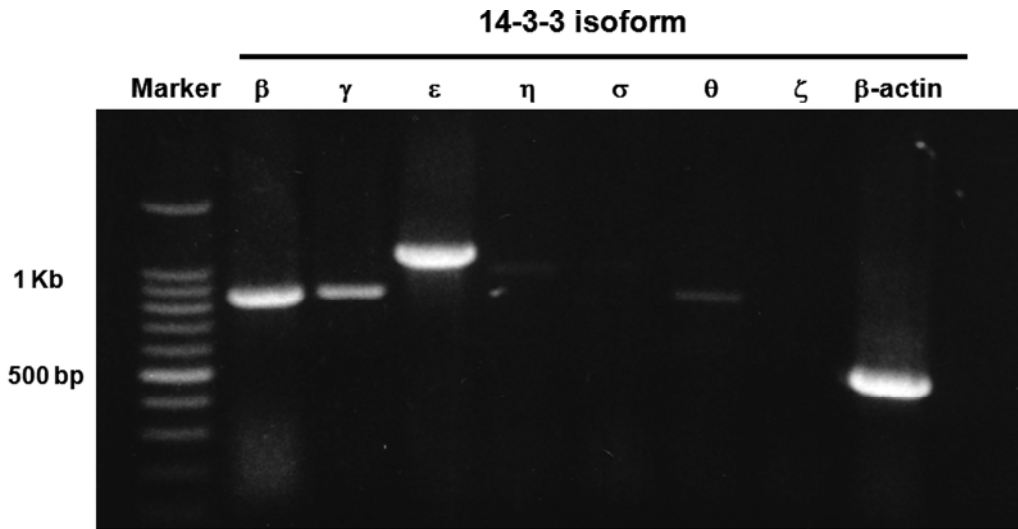

**Suppl Fig. 2A**

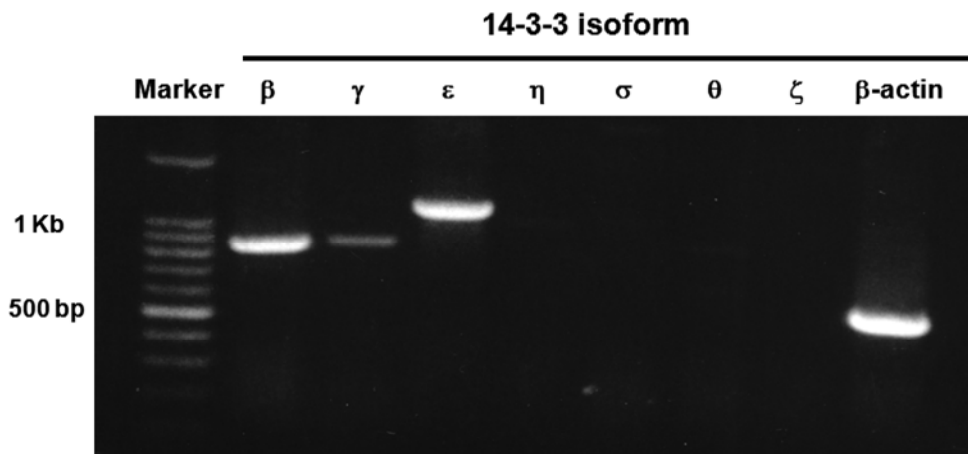

**Suppl Fig. 2B**

**Supplemental Figure 2. 14-3-3 $\beta$ ,  $\gamma$  and  $\epsilon$  isoforms are expressed in HEK293 and Calu-3 airway cells.** The expression of 14-3-3 protein isoforms was determined by RT-PCR using cDNA from HEK293 (A) and Calu-3 (B) cells. Similar patterns of isoform expression were obtained from differentiated primary cultures of human bronchial epithelia, shown in Figure 2A. Products of the appropriate size and sequence for 14-3-3 $\beta$ ,  $\gamma$  and  $\epsilon$  were obtained from the three cell lines.
